# Supplementary material
Source: Springer Nature journal article supplement (https://www.springermedizin.de/resource/supplementary/12967_2011_692_MOESM2_ESM.pdf/9577292)

## Re-evaluation of miRNA-449a and miRNA-449b in fibroblasts - Hypoxia

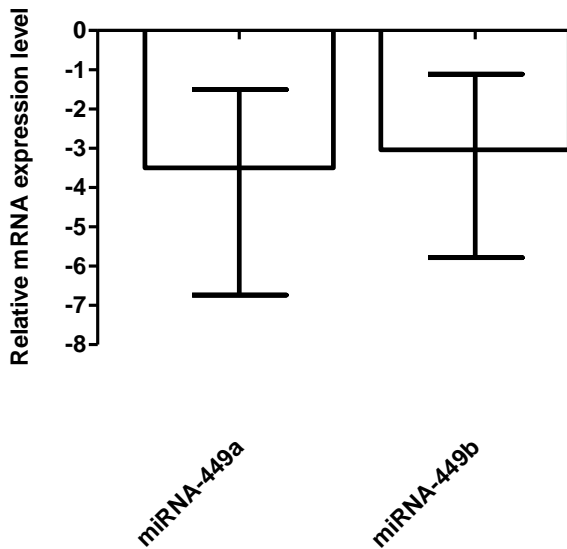

Supplement: MOESM2 [file 9577292]
